# Supplementary material
Source: Springer Nature journal article supplement (https://www.springermedizin.de/resource/supplementary/12876_2011_656_MOESM3_ESM.pdf/9437188)

**Serum TNF-alpha (pg/mL)**

140  
120  
100  
80  
60  
40  
20  
0

Control

Saline

RLS

\*†

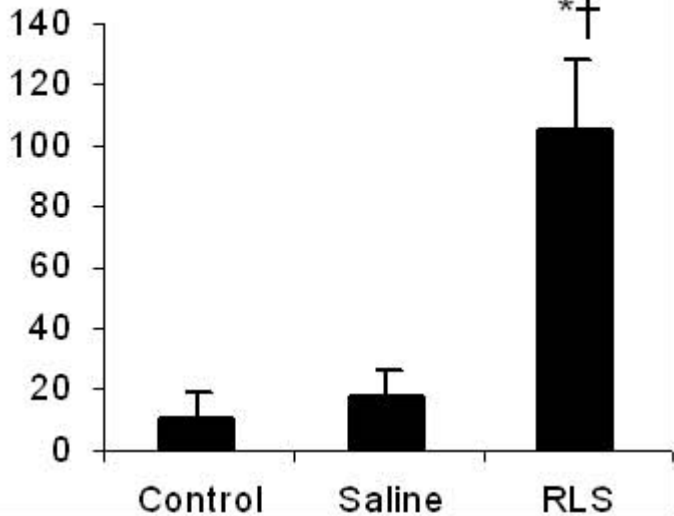

Supplement: MOESM3 [file 9437188]
